# Supplementary material for: Anticancer drug synergy prediction based on CatBoost
Source: PeerJ Comput Sci. 2025 May 19;11:e2829. doi: 10.7717/peerj-cs.2829 (PMC12190655; doi:10.7717/peerj-cs.2829)
Supplement: Supplemental Information 1 [file peerj-cs-11-2829-s001.xlsx]

## Sheet: Sheet1
feature	importance	feature name	feature type
2063	0.00756942	monetherapy	drug
994	0.00490376	drug target	drug
2060	0.00424723	monetherapy	drug
661	0.00337399	morgan fingerprint	drug
2059	0.00278577	monetherapy	drug
643	0.00247164	morgan fingerprint	drug
2062	0.00225729	monetherapy	drug
684	0.00215523	morgan fingerprint	drug
589	0.00212529	morgan fingerprint	drug
393	0.00195271	PTK2	cell
564	0.00185082	morgan fingerprint	drug
877	0.00171872	drug target	drug
544	0.00167229	morgan fingerprint	drug
850	0.00148015	drug target	drug
2058	0.00140241	monetherapy	drug
705	0.00134058	morgan fingerprint	drug
611	0.00132162	morgan fingerprint	drug
481	0.00127126	morgan fingerprint	drug
520	0.00107184	morgan fingerprint	drug
651	0.0010403	morgan fingerprint	drug
2061	0.00102905	monetherapy	drug
519	0.00100047	morgan fingerprint	drug
117	0.000955524	CCND1	cell
598	0.000921528	morgan fingerprint	drug
560	0.000885401	morgan fingerprint	drug
499	0.000867212	morgan fingerprint	drug
723	0.00079296	morgan fingerprint	drug
718	0.000757201	morgan fingerprint	drug
495	0.000756405	morgan fingerprint	drug
1248	0.000749932	drug target	drug
500	0.000749436	morgan fingerprint	drug
634	0.000745562	morgan fingerprint	drug
545	0.000738904	morgan fingerprint	drug
658	0.000681837	morgan fingerprint	drug
518	0.000667905	morgan fingerprint	drug
338	0.000660625	CTNNA1	cell
489	0.000644958	morgan fingerprint	drug
606	0.00063578	morgan fingerprint	drug
638	0.000625439	morgan fingerprint	drug
482	0.000614885	morgan fingerprint	drug
701	0.000611945	morgan fingerprint	drug
622	0.000608362	morgan fingerprint	drug
642	0.000603547	morgan fingerprint	drug
437	0.000594077	LAMB2	cell
274	0.000591983	PLCB2	cell
681	0.000586329	morgan fingerprint	drug
593	0.0005663	morgan fingerprint	drug
353	0.000560675	IL2RG	cell
119	0.000549941	BCL2L1	cell
666	0.000548046	morgan fingerprint	drug
670	0.000542469	morgan fingerprint	drug
149	0.000516469	GNA11	cell
644	0.000515382	morgan fingerprint	drug
663	0.000502642	morgan fingerprint	drug
510	0.000494778	morgan fingerprint	drug
721	0.00049283	morgan fingerprint	drug
645	0.000487205	morgan fingerprint	drug
594	0.000485489	morgan fingerprint	drug
849	0.000482207	drug target	drug
614	0.000477431	morgan fingerprint	drug
624	0.000426668	morgan fingerprint	drug
709	0.000426192	morgan fingerprint	drug
515	0.000420905	morgan fingerprint	drug
517	0.000419977	morgan fingerprint	drug
529	0.000415775	morgan fingerprint	drug
678	0.000404499	morgan fingerprint	drug
662	0.000404008	morgan fingerprint	drug
565	0.000403336	morgan fingerprint	drug
691	0.000395043	morgan fingerprint	drug
680	0.000388403	morgan fingerprint	drug
535	0.000377425	morgan fingerprint	drug
502	0.000371997	morgan fingerprint	drug
649	0.000364956	morgan fingerprint	drug
571	0.000358499	morgan fingerprint	drug
508	0.000357853	morgan fingerprint	drug
549	0.000355261	morgan fingerprint	drug
626	0.000354439	morgan fingerprint	drug
2	0.000354265	ERBB2	cell
522	0.00035289	morgan fingerprint	drug
157	0.000351163	GNB1	cell
512	0.000351033	morgan fingerprint	drug
656	0.000343824	morgan fingerprint	drug
630	0.000340114	morgan fingerprint	drug
601	0.00033403	morgan fingerprint	drug
610	0.000333584	morgan fingerprint	drug
456	0.000333096	EGFR	cell
620	0.000325636	morgan fingerprint	drug
813	0.000322882	drug target	drug
616	0.000320841	morgan fingerprint	drug
625	0.000320422	morgan fingerprint	drug
978	0.000320422	drug target	drug
580	0.00031654	morgan fingerprint	drug
528	0.000315826	morgan fingerprint	drug
650	0.000315158	morgan fingerprint	drug
111	0.000312809	SPI1	cell
822	0.000312054	drug target	drug
470	0.000311614	morgan fingerprint	drug
457	0.000311216	LPAR6	cell
792	0.000311027	drug target	drug
337	0.000308433	CTBP2	cell
